# Supplementary material for: Multilocus sequence typing of Campylobacter concisus from Danish diarrheic patients
Source: PubMed Central journal article supplement (PMC5034547; doi:10.1186/s13099-016-0126-0), 2016-09-22
Supplement: 13099_2016_126_MOESM1_ESM.pdf [file 13099_2016_126_MOESM1_ESM.pdf]

| Patient ID | CMA-Key           | MLST ST | Source | Age | Sex    | Clinical presentation | Genomospecies |
|------------|-------------------|---------|--------|-----|--------|-----------------------|---------------|
| 1          | 2010-112100-oral  | 103     | oral   | 36  | Female | Crohn's disease       | B             |
| 1          | 2010-112100-fecal | 102     | fecal  |     |        |                       | A             |
| 2          | 2010-113332-oral  | 106     | oral   | 57  | Female | diarrhea              | B             |
| 2          | 2010-113332-fecal | 105     | fecal  |     |        |                       | A             |
| 3          | 2010-115605-fecal | 109     | fecal  | 42  | Male   | diarrhea              | B             |
| 3          | 2010-115605-oral  | 104     | oral   |     |        |                       | A/B           |
| 4          | 2010-353175-fecal | 122     | fecal  | 35  | Male   | diarrhea              | A             |
| 4          | 2010-353175-oral  | 110     | oral   |     |        |                       | B             |
| 5          | 2009-91522-fecal  | 115     | fecal  | 29  | Male   | Crohn's disease       | B             |
| 5          | 2009-75775-fecal  | 113     | fecal  |     |        |                       | B             |
| 5          | 2009-91702-fecal  | 115     | fecal  |     |        |                       | B             |
| 6          | 2009-98119-fecal  | 100     | fecal  | 71  | Female | diarrhea              | B             |
| 6          | 2009-98127-fecal  | 100     | fecal  |     |        |                       | B             |
| 7          | 2009-100398-fecal | 85      | fecal  | 78  | Female | diarrhea              | B             |
| 7          | 2009-99978-fecal  | 85      | fecal  |     |        |                       | B             |
| 8          | 2009-102529-fecal | 89      | fecal  | 46  | Male   | Bloody diarrhea       | B             |
| 8          | 2009-103079-fecal | 89      | fecal  |     |        |                       | B             |
| 9          | 2009-102742-fecal | 90      | fecal  | 76  | Female | diarrhea              | B             |
| 9          | 2009-103647-fecal | 90      | fecal  |     |        |                       | B             |
| 9          | 2009-103791-fecal | 90      | fecal  |     |        |                       | B             |
| 10         | 2009-103153-fecal | 91      | fecal  | 1   | Female | Bloody diarrhea       | B             |
| 10         | 2009-103154-fecal | 92      | fecal  |     |        |                       | B             |
| 11         | 2009-123641-fecal | 24      | fecal  | 80  | Male   | diarrhea              | A             |
| 11         | 2009-124699-fecal | 24      | fecal  |     |        |                       | A             |
| 12         | 2009-128071-fecal | 84      | fecal  | 18  | Female | diarrhea              | B             |
| 12         | 2009-128855-fecal | 95      | fecal  |     |        |                       | B             |
| 13         | 2009-158448-fecal | 126     | fecal  | 80  | Male   | Collagenous colitis   | A             |
| 13         | 2009-159743-fecal | 126     | fecal  |     |        |                       | A             |
| 14         | 2010-1718-fecal   | 87      | fecal  | 2   | Female | Crohn's disease       | A             |
| 14         | 2010-34330-fecal  | 88      | fecal  |     |        |                       | B             |
| 15         | 2010-6073-fecal   | 125     | fecal  | 73  | Male   | diarrhea              | A             |
| 15         | 2010-8194-fecal   | 125     | fecal  |     |        |                       | A             |
| 16         | 2012-164712-fecal | 112     | fecal  | 73  | Female | Bloody diarrhea       | A             |
| 16         | 2010-25654-fecal  | 121     | fecal  |     |        |                       | A             |
| 17         | 2010-126945-fecal | 118     | fecal  | 65  | Female | Collagenous colitis   | A/B           |
| 18         | 2010-112825-fecal | 119     | fecal  | 40  | Female | diarrhea              | A/B           |
| 19         | 2010-110904-fecal | 81      | fecal  | 75  | Female | Collagenous colitis   | B             |
| 20         | 2009-83364-fecal  | 124     | fecal  | 59  | Male   | diarrhea              | B             |
| 21         | 2009-174712-fecal | 97      | fecal  | 45  | Male   | diarrhea              | A             |
| 22         | 2009-145343-fecal | 127     | fecal  | 77  | Female | Bloody diarrhea       | B             |
| 23         | 2009-118452-fecal | 93      | fecal  | 19  | Female | Crohn's disease       | B             |
| 24         | 2009-83408-fecal  | 111     | fecal  | 1   | Male   | diarrhea              | B             |
| 25         | 2010-37201-fecal  | 111     | fecal  | 1   | Female | diarrhea              | B             |
| 26         | 2009-42653-fecal  | 112     | fecal  | 1   | Female | diarrhea              | A             |
| 27         | 2009-40096-fecal  | 83      | fecal  | 8   | Male   | diarrhea              | A             |
| 28         | 2009-75710-fecal  | 129     | fecal  | 0   | Male   | diarrhea              | B             |

|    |                   |     |       |    |        |                     |     |
|----|-------------------|-----|-------|----|--------|---------------------|-----|
| 29 | 2009-119100-fecal | 94  | fecal | 63 | Female | Collagenous colitis | A   |
| 30 | 2009-83341-fecal  | 114 | fecal | 78 | Female | Bloody diarrhea     | A   |
| 31 | 2009-173039-fecal | 78  | fecal | 56 | Female | diarrhea            | A   |
| 32 | 2010-33214-fecal  | 78  | fecal | 59 | Male   | diarrhea            | A/B |
| 33 | 2010-7292-fecal   | 78  | fecal | 83 | Male   | diarrhea            | A   |
| 34 | 2010-36743-fecal  | 88  | fecal | 1  | Male   | diarrhea            | B   |
| 35 | 2009-81535-fecal  | 123 | fecal | 2  | Male   | diarrhea            | A/B |
| 36 | 2010-16206-fecal  | 96  | fecal | 69 | Female | Collagenous colitis | B   |
| 37 | 2010-29158-fecal  | 86  | fecal | 70 | Female | diarrhea            | B   |
| 38 | 2009-151380-fecal | 116 | fecal | 73 | Male   | Crohn's disease     | A   |
| 39 | 2010-376221-fecal | 117 | fecal | 58 | Male   | diarrhea            | A   |
| 40 | 2010-112708-fecal | 79  | fecal | 0  | Female | Bloody diarrhea     | B   |
| 41 | 2009-182520-fecal | 98  | fecal | 7  | Male   | diarrhea            | B   |
| 42 | 2010-114237-fecal | 108 | fecal | 59 | Female | Bloody diarrhea     | B   |
| 43 | 2010-112720-fecal | 130 | fecal | 53 | Female | Collagenous colitis | B   |
| 44 | 2009-159586-fecal | 80  | fecal | 32 | Female | diarrhea            | A   |
| 45 | 2009-86120-fecal  | 101 | fecal | 59 | Female | Bloody diarrhea     | B   |
| 46 | 2010-347972-fecal | 128 | fecal | 38 | Male   | diarrhea            | A   |
| 47 | 2010-113862-fecal | 107 | fecal | 64 | Female | diarrhea            | B   |
| 48 | 2009-129008-fecal | 120 | fecal | 86 | Female | diarrhea            | B   |
| 49 | 2009-185843-fecal | 99  | fecal | 80 | Female | Collagenous colitis | A/B |
